# Supplementary material
Source: publisher figshare collection journal article supplement (https://tandf.figshare.com/articles/dataset/_/6509762)
Supplement: Supplementary file 1 [file 1]

**Supplementary Table 2** Whole-rock major (wt.%) and trace elements (ppm) compositions of the representative plutons

| Pluton                                      | Qingduxiang granodiorite |       |       |       |       |       | Longge'er gabbro |       |       |       | Standard sample |                 |
|---------------------------------------------|--------------------------|-------|-------|-------|-------|-------|------------------|-------|-------|-------|-----------------|-----------------|
| Sample                                      | QDX-1                    | QDX-2 | QDX-3 | QDX-4 | QDX-5 | QDX-6 | LGR-1            | LGR-2 | LGR-3 | LGR-4 | GBW07105        | Detection limit |
| <i>Major elements (wt.%)</i>                |                          |       |       |       |       |       |                  |       |       |       |                 |                 |
| SiO <sub>2</sub>                            | 71.56                    | 71.52 | 71.85 | 71.87 | 71.81 | 71.11 | 51.68            | 51.63 | 51.74 | 51.78 | 44.51           | 0.010           |
| TiO <sub>2</sub>                            | 0.35                     | 0.33  | 0.35  | 0.35  | 0.33  | 0.34  | 1.71             | 1.71  | 1.71  | 1.73  | 2.35            | 0.006           |
| Al <sub>2</sub> O <sub>3</sub>              | 14.36                    | 14.37 | 14.17 | 14.16 | 14.24 | 14.68 | 16.09            | 16.34 | 16.34 | 16.42 | 13.81           | 0.010           |
| <sup>T</sup> Fe <sub>2</sub> O <sub>3</sub> | 2.66                     | 2.51  | 2.74  | 2.75  | 2.6   | 2.66  | 6.61             | 6.38  | 6.47  | 6.37  | 13.29           | 0.010           |
| <sup>T</sup> FeO                            | 2.39                     | 2.26  | 2.47  | 2.47  | 2.34  | 2.39  | 5.95             | 5.74  | 5.83  | 5.73  | 7.50            | 0.100           |
| MnO                                         | 0.04                     | 0.05  | 0.07  | 0.02  | 0.02  | 0.04  | 0.05             | 0.04  | 0.05  | 0.04  | 0.171           | 0.004           |
| MgO                                         | 0.62                     | 0.6   | 0.66  | 0.67  | 0.6   | 0.66  | 5.95             | 5.93  | 5.9   | 5.84  | 7.68            | 0.010           |
| CaO                                         | 2.22                     | 2.06  | 2.12  | 2.25  | 2.16  | 2.15  | 11.84            | 11.79 | 11.58 | 11.61 | 8.89            | 0.010           |
| Na <sub>2</sub> O                           | 3.52                     | 3.4   | 3.41  | 3.5   | 3.41  | 3.44  | 3.26             | 3.36  | 3.31  | 3.33  | 3.41            | 0.010           |
| K <sub>2</sub> O                            | 4.08                     | 4.56  | 4.08  | 3.84  | 4.23  | 4.32  | 0.48             | 0.47  | 0.5   | 0.49  | 2.29            | 0.010           |
| P <sub>2</sub> O <sub>5</sub>               | 0.09                     | 0.08  | 0.09  | 0.09  | 0.09  | 0.09  | 0.75             | 0.75  | 0.74  | 0.75  | 0.948           | 0.006           |
| LOI                                         | 0.38                     | 0.41  | 0.39  | 0.4   | 0.39  | 0.42  | 1.32             | 1.34  | 1.44  | 1.41  |                 |                 |
| Total                                       | 99.88                    | 99.9  | 99.93 | 99.9  | 99.88 | 99.91 | 99.74            | 99.74 | 99.78 | 99.77 |                 |                 |
| Alkaline                                    | 7.6                      | 7.96  | 7.49  | 7.34  | 7.64  | 7.76  | 3.74             | 3.83  | 3.81  | 3.82  |                 |                 |
| A/NK                                        | 1.41                     | 1.36  | 1.41  | 1.43  | 1.4   | 1.42  | 2.73             | 2.71  | 2.73  | 2.73  |                 |                 |
| A/CNK                                       | 1.01                     | 1.01  | 1.02  | 1.01  | 1.01  | 1.03  | 0.59             | 0.59  | 0.6   | 0.6   |                 |                 |
| Mg <sup>#</sup>                             | 32                       | 32    | 33    | 33    | 32    | 33    | 64               | 65    | 65    | 65    |                 |                 |
| Sample                                      | QDX-1                    | QDX-2 | QDX-3 | QDX-4 | QDX-5 | QDX-6 | LGR-1            | LGR-2 | LGR-3 | LGR-4 | GBW07312        | Detection limit |
| <i>Trace elements (ppm)</i>                 |                          |       |       |       |       |       |                  |       |       |       |                 |                 |
| La                                          | 27.4                     | 22.4  | 29.3  | 24.0  | 34.7  | 32.1  | 49.3             | 50.2  | 49.5  | 45.2  | 31.2            | 0.033           |
| Ce                                          | 51.6                     | 69.6  | 66.1  | 63.1  | 71.2  | 70.4  | 104.0            | 106.0 | 104.0 | 95.1  | 59.0            | 0.059           |
| Pr                                          | 6.16                     | 5.20  | 6.48  | 5.40  | 7.22  | 7.08  | 13.10            | 13.50 | 13.40 | 12.10 | 6.76            | 0.011           |
| Nd                                          | 22.4                     | 19.7  | 23.7  | 20.0  | 25.7  | 26.2  | 50.7             | 51.7  | 51.3  | 47.0  | 25.2            | 0.038           |
| Sm                                          | 4.41                     | 4.20  | 4.64  | 4.17  | 5.02  | 5.33  | 8.56             | 8.97  | 8.64  | 8.10  | 4.86            | 0.011           |
| Eu                                          | 0.87                     | 0.91  | 0.90  | 0.89  | 1.01  | 1.00  | 1.90             | 1.97  | 1.90  | 1.79  | 0.564           | 0.003           |
| Gd                                          | 3.38                     | 3.70  | 3.74  | 3.54  | 4.12  | 4.34  | 6.68             | 6.94  | 6.46  | 6.36  | 4.25            | 0.010           |
| Tb                                          | 0.59                     | 0.63  | 0.63  | 0.60  | 0.70  | 0.74  | 1.02             | 1.10  | 1.00  | 1.02  | 0.777           | 0.005           |

|                      |        |       |        |        |        |        |        |       |       |        |       |       |
|----------------------|--------|-------|--------|--------|--------|--------|--------|-------|-------|--------|-------|-------|
| Dy                   | 3.68   | 4.12  | 3.96   | 3.82   | 4.48   | 4.82   | 5.92   | 6.38  | 5.71  | 6.04   | 4.44  | 0.012 |
| Ho                   | 0.75   | 0.85  | 0.80   | 0.78   | 0.90   | 0.98   | 1.12   | 1.22  | 1.08  | 1.15   | 0.879 | 0.005 |
| Er                   | 2.24   | 2.61  | 2.45   | 2.39   | 2.77   | 3.00   | 3.10   | 3.39  | 3.03  | 3.20   | 2.64  | 0.007 |
| Tm                   | 0.36   | 0.41  | 0.38   | 0.37   | 0.43   | 0.48   | 0.43   | 0.47  | 0.42  | 0.44   | 0.512 | 0.005 |
| Yb                   | 2.31   | 2.71  | 2.56   | 2.48   | 2.87   | 3.14   | 2.56   | 2.76  | 2.58  | 2.69   | 3.46  | 0.007 |
| Lu                   | 0.33   | 0.39  | 0.37   | 0.36   | 0.40   | 0.45   | 0.33   | 0.36  | 0.33  | 0.33   | 0.512 | 0.004 |
| Y                    | 21.1   | 25.3  | 23.8   | 23.2   | 26.2   | 28.8   | 31.0   | 33.4  | 29.6  | 31.5   | 26.2  | 0.050 |
| Rb                   | 149.2  | 163.0 | 147.3  | 146.1  | 163.5  | 162.1  | 27.1   | 28.7  | 26.7  | 29.0   | 275   | 0.070 |
| Ba                   | 668    | 802   | 643    | 598    | 728    | 652    | 44     | 49    | 48    | 49     | 194   | 0.441 |
| Th                   | 9.4    | 8.7   | 27.3   | 10.0   | 14.6   | 15.3   | 5.0    | 5.4   | 5.1   | 5.1    | 20.3  | 0.013 |
| U                    | 1.6    | 2.3   | 7.4    | 2.3    | 3.4    | 3.0    | 0.8    | 0.9   | 0.8   | 0.8    | 7.87  | 0.010 |
| Nb                   | 9.1    | 9.0   | 9.8    | 9.5    | 9.9    | 11.0   | 18.5   | 18.8  | 16.2  | 21.2   | 16.3  | 0.010 |
| Ta                   | 0.5    | 0.6   | 0.7    | 0.6    | 0.8    | 0.8    | 0.9    | 1.0   | 0.8   | 1.1    | 3.15  | 0.004 |
| Pb                   | 19.0   | 18.6  | 18.9   | 18.2   | 19.1   | 18.3   | 12.8   | 14.1  | 10.8  | 11.7   | 277   | 0.030 |
| Sr                   | 167    | 162   | 209    | 198    | 229    | 210    | 629    | 680   | 594   | 629    | 22.5  | 0.791 |
| Zr                   | 10     | 14    | 13     | 11     | 13     | 11     | 172    | 186   | 192   | 183    | 227   | 0.048 |
| Hf                   | 0.5    | 0.6   | 0.7    | 0.6    | 0.6    | 0.6    | 4.4    | 4.4   | 4.7   | 4.1    | 7.33  | 0.004 |
| Ni                   | 1.4    | 0.7   | 5.9    | 1.0    | 1.2    | 0.8    | 74.8   | 71.7  | 66.4  | 67.7   | 14.4  | 0.023 |
| Co                   | 3.0    | 2.9   | 3.1    | 3.1    | 2.9    | 3.3    | 12.9   | 13.4  | 11.9  | 12.0   | 8.95  | 0.007 |
| Cr                   | 1.5    | 0.9   | 1.7    | 0.9    | 2.0    | 2.0    | 175.0  | 165.0 | 142.0 | 151.0  | 35.3  | 0.005 |
| ΣREE                 | 126.45 | 137.4 | 145.96 | 131.85 | 161.47 | 160.03 | 248.66 | 254.9 | 249.3 | 230.56 |       |       |
| LREE/HREE            | 8.27   | 7.91  | 8.8    | 8.19   | 8.69   | 7.92   | 10.75  | 10.27 | 11.1  | 9.86   |       |       |
| (La/Yb) <sub>N</sub> | 8.06   | 5.62  | 7.78   | 6.57   | 8.21   | 6.94   | 13.08  | 12.36 | 13.03 | 11.41  |       |       |
| Eu/Eu*               | 0.66   | 0.69  | 0.64   | 0.69   | 0.66   | 0.62   | 0.74   | 0.74  | 0.75  | 0.73   |       |       |
| Ce/Ce*               | 0.93   | 1.51  | 1.11   | 1.29   | 1.04   | 1.08   | 0.97   | 0.97  | 0.96  | 0.97   |       |       |

Notes: LOI = loss on ignition,  ${}^T\text{FeO} = \text{FeO} + 0.8998 \times \text{Fe}_2\text{O}_3$ ,  ${}^T\text{Fe}_2\text{O}_3 = 1.111 \times \text{FeO} + \text{Fe}_2\text{O}_3$ , alkaline (wt.%) =  $\text{Na}_2\text{O} + \text{K}_2\text{O}$ ,  $\text{A/CNK} = \text{Al}_2\text{O}_3/(\text{CaO} + \text{Na}_2\text{O} + \text{K}_2\text{O})$  molar,  $\text{A/NK} = \text{Al}_2\text{O}_3/(\text{Na}_2\text{O} + \text{K}_2\text{O})$  molar,  $\text{Mg}^\# = 100 \times \text{molar Mg}^{2+}/(\text{Mg}^{2+} + {}^T\text{Fe}^{2+})$ ,  $\text{Eu/Eu}^* = 2 \times w(\text{Eu})_N/[w(\text{Sm})_N + w(\text{Gd})_N]$ ,  $\text{Ce/Ce}^* = 2 \times w(\text{Ce})_N/[w(\text{La})_N + w(\text{Pr})_N]$ ,  $(\text{La/Yb})_N$  = chondrite-normalized La/Yb ratio. N denotes normalization to chondrite values, using the chondrite compositions from [Sun and McDonough \(1989\)](#).

Sun, S.S., and McDonough, W.S., 1989, Chemical and isotopic systematics of oceanic basalts: implications for mantle composition and processes: Geological Society, London, Special Publications, v. 42, p. 313-345. <https://doi.org/10.1144/GSL.SP.1989.042.01.19>
