# Supplementary material
Source: publisher figshare collection journal article supplement (https://tandf.figshare.com/articles/dataset/_/6509762)
Supplement: Supplementary file 2 [file 1]

**Supplementary Table 5** Zircon trace element analyses for the representative plutons (ppm).

| Spot                            | La   | Ce    | Pr   | Nd   | Sm   | Eu   | Gd    | Tb   | Dy    | Ho    | Er     | Tm    | Yb     | Lu    | Hf      | Ta  | Y      | Nb   | Pb   | Th     | U      |
|---------------------------------|------|-------|------|------|------|------|-------|------|-------|-------|--------|-------|--------|-------|---------|-----|--------|------|------|--------|--------|
| <i>Qingduxiang granodiorite</i> |      |       |      |      |      |      |       |      |       |       |        |       |        |       |         |     |        |      |      |        |        |
| QDX-0-1                         | 0.2  | 40.9  | 1.4  | 22.2 | 38.9 | 13.6 | 214.2 | 69.5 | 793.7 | 292.1 | 1231.7 | 251.8 | 2352.8 | 455.7 | 25515.4 | 1.9 | 7950.3 | 6.4  | 11.2 | 903.5  | 866.1  |
| QDX-0-2                         | 11   | 85.8  | 3.6  | 19   | 12.7 | 1.1  | 63.7  | 23.3 | 287.1 | 116.2 | 530.4  | 113.7 | 1091.5 | 214.7 | 31309.8 | 4.8 | 3299   | 11.2 | 12.7 | 758.3  | 1148.3 |
| QDX-0-3                         | 16.1 | 97.1  | 6.1  | 30.7 | 15.6 | 1.8  | 76.1  | 25.6 | 320.3 | 125.8 | 575.6  | 127.4 | 1231.9 | 246.3 | 28889.4 | 5.1 | 3616.6 | 10.8 | 13.7 | 699.4  | 1057.1 |
| QDX-0-4                         | 0.1  | 35.8  | 0.5  | 6.5  | 14.2 | 5.1  | 92.5  | 32.9 | 426.1 | 178   | 830.6  | 174.6 | 1728.3 | 344.6 | 22281.8 | 2.5 | 5118.7 | 7.5  | 12.2 | 813.2  | 891    |
| QDX-0-5                         | 0.1  | 57.5  | 0.2  | 4.2  | 12.2 | 1.8  | 65.8  | 23.6 | 289.4 | 116   | 528.9  | 117.8 | 1148.2 | 230   | 32099.8 | 4.5 | 3327.5 | 11.4 | 12.3 | 725.4  | 1048.7 |
| QDX-0-6                         | 41   | 143.5 | 12.8 | 67.3 | 24.7 | 2.3  | 80.1  | 27.7 | 312.3 | 124.4 | 559.5  | 116.2 | 1110.4 | 216.4 | 29229.6 | 3.8 | 3475.7 | 11.2 | 13.6 | 834.3  | 1142.8 |
| QDX-0-7                         | 0.1  | 49.5  | 0.1  | 4.6  | 9.5  | 2    | 60.7  | 25.3 | 297.6 | 121.6 | 569    | 121.7 | 1177   | 235.5 | 33603.6 | 4.7 | 3454.9 | 10.3 | 9.1  | 540.6  | 922.2  |
| QDX-0-8                         | 0    | 83    | 0.3  | 6.1  | 15.5 | 1.8  | 96.7  | 35.5 | 424.8 | 162.9 | 712.6  | 146.7 | 1379.2 | 266   | 30626.3 | 6.2 | 4483.7 | 15   | 25.7 | 1987   | 1850.9 |
| QDX-0-9                         | 0    | 56.2  | 0.1  | 1.6  | 7.4  | 1    | 43.5  | 16.3 | 208.5 | 86    | 422.9  | 95.2  | 990    | 202.7 | 30838   | 4.4 | 2610   | 9.9  | 13.4 | 674.9  | 1102.6 |
| QDX-0-10                        | 13   | 68.1  | 4.5  | 38   | 42.2 | 7.5  | 209.7 | 66.9 | 763.5 | 272.1 | 1152.6 | 226.2 | 2042.2 | 382.5 | 27348.4 | 2.5 | 7493.2 | 6.6  | 14   | 1071   | 1124.6 |
| QDX-0-11                        | 5.6  | 63.6  | 1.7  | 8.5  | 9.4  | 0.4  | 50.1  | 19.7 | 244   | 100   | 464.8  | 103.4 | 1007.8 | 204.7 | 31514.4 | 4.8 | 2881   | 11   | 11.1 | 610.6  | 989.9  |
| QDX-0-12                        | 12.2 | 81.7  | 3.2  | 18.3 | 11.1 | 1.5  | 52.8  | 20.2 | 246   | 98.3  | 461.3  | 104.3 | 996.2  | 195.9 | 30150.3 | 5.1 | 2858.6 | 9.1  | 13   | 697.9  | 1051.6 |
| QDX-0-13                        | 31.6 | 136.7 | 9.6  | 46.5 | 21.7 | 1.4  | 72.3  | 24   | 298.5 | 118.3 | 541.4  | 118.3 | 1120.6 | 219.2 | 30246   | 4.5 | 3372.7 | 11.3 | 15.2 | 850.7  | 1227.8 |
| QDX-0-14                        | 23   | 116.5 | 8.3  | 35.9 | 25.1 | 3.2  | 122.4 | 38.1 | 451.6 | 173.1 | 742.4  | 153.5 | 1402.1 | 267.3 | 29518.5 | 4.2 | 4760.5 | 12.2 | 22.3 | 1665.1 | 1557.8 |
| QDX-0-15                        | 1    | 53.9  | 0.5  | 4.4  | 10.1 | 1.9  | 55.1  | 21.9 | 263.8 | 111.5 | 521.9  | 118.3 | 1128.3 | 228.5 | 29876   | 3.9 | 3170.9 | 9.5  | 12   | 719.7  | 1034   |
| QDX-0-16                        | 7.2  | 56.7  | 1.2  | 11.5 | 4.2  | 0.5  | 25.8  | 12   | 162.3 | 65.7  | 321.7  | 76.3  | 775.7  | 164.2 | 33495.5 | 4.6 | 1987.3 | 7.5  | 15.8 | 515.9  | 863.3  |
| QDX-0-17                        | 45.2 | 165.9 | 13.3 | 63.4 | 17.5 | 1.4  | 53.8  | 17.4 | 233.2 | 92.9  | 431.3  | 97.9  | 949    | 193.9 | 29894.3 | 3.9 | 2697.6 | 10.8 | 13   | 675.8  | 1032.9 |
| QDX-0-18                        | 3.4  | 83    | 1.8  | 18.3 | 37.1 | 5.8  | 200.9 | 68.5 | 808.5 | 293.8 | 1221.8 | 245.7 | 2218.9 | 419.3 | 26657.8 | 4.5 | 8127.9 | 13   | 23.9 | 1894.7 | 1821.8 |
| QDX-0-19                        | 0    | 18    | 0.2  | 3.5  | 6.5  | 2.7  | 29.1  | 9.2  | 103.3 | 34.3  | 152.9  | 32.5  | 306.5  | 62.5  | 25198.8 | 1.4 | 1032.8 | 2.8  | 25.7 | 309    | 526.5  |
| QDX-0-20                        | 21.1 | 112.7 | 8.6  | 47.4 | 16.2 | 1.2  | 64.1  | 21.4 | 250   | 100.1 | 465.3  | 95    | 925.2  | 184.5 | 30219.7 | 4   | 2847.5 | 10   | 11.9 | 659.8  | 1014.3 |
| QDX-0-21                        | 0    | 34.5  | 0.6  | 9.7  | 14.6 | 4.6  | 58.7  | 16.5 | 187.6 | 68.6  | 294.6  | 63.1  | 606    | 123.4 | 25035.9 | 1.9 | 2015.1 | 4.5  | 65   | 889.8  | 1251.7 |
| QDX-0-22                        | 0.1  | 37.5  | 1.1  | 15   | 34.8 | 10.7 | 169   | 54.8 | 598.8 | 217.6 | 950.7  | 199.2 | 1877.4 | 370.6 | 24007.6 | 1.1 | 6206.9 | 5.7  | 8.8  | 644    | 653.2  |
| QDX-0-23                        | 51.6 | 152.3 | 15.2 | 77.8 | 35.9 | 6.7  | 130.1 | 40   | 459.7 | 170.2 | 732.6  | 151.1 | 1361.3 | 270.1 | 24992.8 | 2.2 | 4650.4 | 6.7  | 17.7 | 758.4  | 750.3  |
| QDX-0-24                        | 0.3  | 110.3 | 2.2  | 30.4 | 41.9 | 8.1  | 190.5 | 52.7 | 598.5 | 217.3 | 922.9  | 187.6 | 1706.1 | 342.6 | 18676   | 1.5 | 5952.2 | 7.6  | 8.2  | 603.1  | 456    |
| QDX-0-25                        | 0.1  | 26.5  | 0.9  | 13.9 | 23.2 | 6.2  | 131.7 | 41.4 | 502.2 | 188   | 823.4  | 180.5 | 1673.9 | 339.1 | 26630.6 | 1.8 | 5465   | 5    | 8    | 550.4  | 705    |
| QDX-0-26                        | 5.3  | 66.5  | 1.5  | 7.1  | 8.6  | 0.8  | 47.1  | 18.1 | 231.1 | 94.9  | 452.5  | 105.7 | 1039.6 | 209.8 | 30631.2 | 4.6 | 2845   | 10.6 | 13.6 | 695    | 1056   |
| QDX-0-27                        | 1.9  | 58.2  | 1    | 6.4  | 11.3 | 2.2  | 74.7  | 28.2 | 360.6 | 146.1 | 691.9  | 149.6 | 1449.1 | 287.1 | 28696.5 | 4.4 | 4320.9 | 12.1 | 14.3 | 922    | 1210.3 |

*Longge'er gabbro*

|          |      |      |     |      |      |     |      |      |       |      |       |      |       |       |         |     |        |     |      |       |       |
|----------|------|------|-----|------|------|-----|------|------|-------|------|-------|------|-------|-------|---------|-----|--------|-----|------|-------|-------|
| LGR-0-1  | 0    | 17.9 | 0.1 | 1    | 2.4  | 0.3 | 17.9 | 6.5  | 79.6  | 33   | 160.2 | 35.7 | 345.9 | 71.2  | 11270.6 | 1.3 | 1008.5 | 3   | 3.9  | 223.1 | 344.9 |
| LGR-0-2  | 0    | 20.8 | 0.2 | 1.8  | 5.7  | 0.5 | 38.5 | 14.5 | 189.1 | 80.2 | 401.3 | 92.4 | 946.6 | 197.9 | 12925.2 | 2.4 | 2530.4 | 2.4 | 19.6 | 724.9 | 899   |
| LGR-0-3  | 0    | 12.9 | 0.1 | 0.6  | 2.3  | 0.4 | 14.9 | 5.7  | 79.8  | 33.3 | 166.4 | 38.6 | 386.5 | 82.8  | 11298.4 | 1   | 1043.9 | 1.6 | 4.9  | 158.7 | 208.6 |
| LGR-0-4  | 8.6  | 46.2 | 3.6 | 17.2 | 8    | 0.7 | 41.5 | 11.2 | 135.2 | 52.2 | 222.7 | 45.5 | 422.1 | 81.1  | 9460.4  | 1.1 | 1487.4 | 2.7 | 4.8  | 360   | 373   |
| LGR-0-5  | 7.8  | 31.1 | 2.2 | 10.6 | 6.9  | 1   | 32   | 10.9 | 135   | 53.4 | 242.1 | 50.1 | 472.5 | 95.4  | 9877.6  | 1.1 | 1529.2 | 2.6 | 5.6  | 219   | 214.2 |
| LGR-0-6  | 8.9  | 44.2 | 2.2 | 11.2 | 7.3  | 1.2 | 37.7 | 12   | 152.4 | 62.6 | 286.5 | 61.7 | 595.8 | 120.4 | 8919.8  | 1.2 | 1885.4 | 4.2 | 10.3 | 476.2 | 373.4 |
| LGR-0-7  | 0.1  | 9.1  | 0.1 | 0.7  | 1.8  | 0.3 | 15.9 | 6.7  | 94.2  | 39.2 | 200.4 | 46   | 477.3 | 103   | 10964.2 | 1.2 | 1242.2 | 2.3 | 8.2  | 204.8 | 357.9 |
| LGR-0-8  | 0.5  | 16.2 | 0.2 | 1.2  | 1.6  | 0.2 | 10.2 | 4.3  | 57.2  | 23.8 | 118.5 | 26.5 | 278.8 | 57.6  | 11581.2 | 1.2 | 754.4  | 2.8 | 3    | 155.2 | 270.4 |
| LGR-0-9  | 3.1  | 19.6 | 1   | 4.7  | 2.9  | 0.4 | 16.7 | 5.9  | 79.6  | 33.3 | 165.4 | 37.5 | 376.8 | 80.4  | 10224   | 1   | 1023.4 | 1.9 | 5    | 163.3 | 204.1 |
| LGR-0-10 | 1.1  | 16.9 | 0.6 | 2.9  | 3.4  | 0.7 | 24.9 | 9.8  | 132.3 | 51   | 237.7 | 51.1 | 487.2 | 99    | 10681.9 | 1.5 | 1517   | 2.3 | 6.3  | 247   | 261.5 |
| LGR-0-11 | 1.3  | 21.8 | 0.4 | 2.6  | 2.3  | 0.2 | 14.6 | 5.7  | 69.5  | 29.4 | 151.5 | 35.2 | 349.9 | 74.6  | 12314.8 | 1.9 | 938.4  | 3.9 | 5.5  | 295.7 | 487.4 |
| LGR-0-12 | 0.3  | 22.9 | 0.1 | 1.9  | 4.4  | 0.4 | 28.3 | 10.1 | 123.8 | 49.2 | 228.2 | 47.7 | 458   | 91.5  | 10968.9 | 1.2 | 1457.6 | 2.4 | 7.9  | 416.5 | 285.8 |
| LGR-0-13 | 16.7 | 79.5 | 5.2 | 24.3 | 11.8 | 1   | 53.4 | 17.5 | 217.8 | 84.1 | 379.7 | 81.7 | 731.2 | 145   | 10875.2 | 1.6 | 2481.6 | 4.2 | 12.7 | 763.1 | 446.8 |
| LGR-0-14 | 0.2  | 14.1 | 0.1 | 1.3  | 2.6  | 0.5 | 18.2 | 5.9  | 81.6  | 32.8 | 153.5 | 33.2 | 325.8 | 67.9  | 11810.3 | 1.3 | 971.5  | 2.5 | 3.4  | 168.8 | 288.9 |
