# Supplementary material
Source: publisher figshare collection journal article supplement (https://tandf.figshare.com/articles/dataset/_/6509762)
Supplement: Supplementary file 3 [file 1]

**Supplementary Table 3** Whole-rock Sr, Nd and Pb isotopic compositions of the representative plutons

| Pluton                              | Qingduxiang granodiorite |           |           | Longge'er gabbro |           |           |
|-------------------------------------|--------------------------|-----------|-----------|------------------|-----------|-----------|
| Sample                              | QDX-05-02                | QDX-05-03 | QDX-05-04 | LGR-03-02        | LGR-03-03 | LGR-03-04 |
| Age (Ma)                            | 55                       | 55        | 55        | 54               | 54        | 54        |
| Rb (ppm)                            | 192                      | 205       | 202       | 28.3             | 28.2      | 29.7      |
| Sr (ppm)                            | 280                      | 271       | 271       | 601              | 606       | 596       |
| $^{87}\text{Rb}/^{86}\text{Sr}$     | 1.9853                   | 2.1866    | 2.1563    | 0.1363           | 0.1345    | 0.1443    |
| $^{87}\text{Sr}/^{86}\text{Sr}$     | 0.708031                 | 0.708175  | 0.70814   | 0.708435         | 0.708457  | 0.7084    |
| $\pm 2\sigma$                       | 0.000009                 | 0.000009  | 0.000011  | 0.000009         | 0.000014  | 0.000009  |
| $^{87}\text{Sr}/^{86}\text{Sr}_i$   | 0.706494                 | 0.706482  | 0.706471  | 0.708331         | 0.708355  | 0.70829   |
| Sm (ppm)                            | 5.58                     | 5.83      | 5.59      | 7.94             | 7.72      | 8.36      |
| Nd (ppm)                            | 27.9                     | 31.3      | 29.5      | 46.6             | 43.9      | 48.9      |
| $^{147}\text{Sm}/^{144}\text{Nd}$   | 0.1210                   | 0.1124    | 0.1143    | 0.1031           | 0.1064    | 0.1033    |
| $^{143}\text{Nd}/^{144}\text{Nd}$   | 0.512402                 | 0.512448  | 0.512447  | 0.512424         | 0.512355  | 0.512336  |
| $\pm 2\sigma$                       | 0.000012                 | 0.000008  | 0.000010  | 0.000011         | 0.000010  | 0.000012  |
| $\epsilon_{\text{Nd}}(t)$           | -4.1                     | -3.1      | -3.2      | -3.5             | -4.9      | -5.3      |
| $T_{\text{DM}}$ (Ma)                | 1232                     | 1059      | 1080      | 1003             | 1131      | 1126      |
| $^{208}\text{Pb}/^{204}\text{Pb}$   | 38.958                   | 39.010    | 38.963    | 39.050           | 39.036    | 39.035    |
| $\pm 2\sigma$                       | 0.004                    | 0.005     | 0.003     | 0.005            | 0.003     | 0.003     |
| $^{207}\text{Pb}/^{204}\text{Pb}$   | 15.622                   | 15.621    | 15.623    | 15.669           | 15.666    | 15.663    |
| $\pm 2\sigma$                       | 0.002                    | 0.002     | 0.001     | 0.002            | 0.001     | 0.002     |
| $^{206}\text{Pb}/^{204}\text{Pb}$   | 18.714                   | 18.710    | 18.703    | 18.675           | 18.672    | 18.673    |
| $\pm 2\sigma$                       | 0.002                    | 0.002     | 0.002     | 0.003            | 0.001     | 0.001     |
| $^{208}\text{Pb}/^{204}\text{Pb}_i$ | 38.958                   | 39.010    | 38.963    | 39.050           | 39.036    | 39.035    |
| $^{207}\text{Pb}/^{204}\text{Pb}_i$ | 15.669                   | 15.666    | 15.663    | 15.622           | 15.621    | 15.623    |
| $^{206}\text{Pb}/^{204}\text{Pb}_i$ | 18.675                   | 18.672    | 18.673    | 18.714           | 18.710    | 18.703    |

Notes:  $^{87}\text{Sr}/^{86}\text{Sr}_i = ^{87}\text{Sr}/^{86}\text{Sr} - ^{87}\text{Rb}/^{86}\text{Sr} \times (e^{\lambda t} - 1)$ , where  $\lambda$  is the decay constant and where  $\lambda_{\text{Rb-Sr}} = 0.0142 \text{ Ga}^{-1}$ .  $(^{143}\text{Nd}/^{144}\text{Nd})_i = ^{143}\text{Nd}/^{144}\text{Nd} - (^{147}\text{Sm}/^{144}\text{Nd}) \times (e^{\lambda t} - 1)$ , where  $\lambda$  is the decay constant and where  $\lambda_{\text{Sm-Nd}} = 0.00654 \text{ Ga}^{-1}$ .  $\epsilon_{\text{Nd}}(t) = [(^{143}\text{Nd}/^{144}\text{Nd})_{\text{Sample}}(t) / (^{143}\text{Nd}/^{144}\text{Nd})_{\text{CHUR}}(t) - 1] \times 104$ ;  $(^{143}\text{Nd}/^{144}\text{Nd})_{\text{CHUR}}(t) = 0.512638 - 0.1967 \times (e^{\lambda t} - 1)$ , where  $t$  is the age of the sample.  $T_{\text{DM}} = 1/\lambda_{\text{Sm-Nd}} \times \ln\{1 + [((^{143}\text{Nd}/^{144}\text{Nd})_{\text{Sample}} - 0.51315) / ((^{147}\text{Sm}/^{144}\text{Nd})_{\text{Sample}} - 0.2137)]\}$ , where  $T_{\text{DM}}$  is the depleted mantle model age.  $f_{\text{Sm/Nd}} = [(^{147}\text{Sm}/^{144}\text{Nd}) / 0.1967] - 1$ , where  $f_{\text{Sm/Nd}}$  is the fractionation factor of the sample. All the modern Sm/Nd values in CHUR (chondritic uniform reservoir) and DM

(depleted mantle) are as suggested by Goldstein *et al* (1984) and Peucat *et al* (1988).  $^{206}\text{Pb}/^{204}\text{Pb}_i$ ,  $^{207}\text{Pb}/^{204}\text{Pb}_i$  and  $^{208}\text{Pb}/^{204}\text{Pb}_i$  values are calculated by the measured whole rock U, Th and Pb contents and Pb isotopic ratios.  $2\sigma$  represents the standard deviation.

Goldstein, S.L., O’Nions, R.K., and Hamilton, P.J., 1984, A Sm-Nd isotopic study of atmospheric dusts and particulates from major river systems: *Earth and Planetary Science Letters*, v. 70, p. 221-236. [https://doi.org/10.1016/0012-821X\(84\)90007-4](https://doi.org/10.1016/0012-821X(84)90007-4)

Peucat, J.J., Jegouzo, P., Vidal, P., and Bernard-Griffiths, J., 1988, Continental crust formation seen through the Sr and Nd isotope systematics of S-type granites in the Hercynian belt of western France: *Earth and Planetary Science Letters*, v. 88, p. 60-68. [https://doi.org/10.1016/0012-821X\(88\)90046-5](https://doi.org/10.1016/0012-821X(88)90046-5)
