# Supplementary material
Source: publisher figshare collection journal article supplement (https://tandf.figshare.com/articles/dataset/_/6509762)
Supplement: Supplementary file 4 [file 1]

**Supplementary Table 4** LA-ICP-MS zircon U-Pb isotopic analyses for zircon grains from the representative plutons

| Spot                                                         | Isotope content |        | Th/U | Ratios                               |        |        |                                     |        |        |                                     |        | Age(Ma) |                                      |     |    |                                      |   |    |                                     |  |    |                                     |  |    |
|--------------------------------------------------------------|-----------------|--------|------|--------------------------------------|--------|--------|-------------------------------------|--------|--------|-------------------------------------|--------|---------|--------------------------------------|-----|----|--------------------------------------|---|----|-------------------------------------|--|----|-------------------------------------|--|----|
|                                                              | Th(ppm)         | U(ppm) |      | <sup>207</sup> Pb/ <sup>206</sup> Pb |        | 1σ     | <sup>207</sup> Pb/ <sup>235</sup> U |        | 1σ     | <sup>206</sup> Pb/ <sup>238</sup> U |        | 1σ      | <sup>208</sup> Pb/ <sup>232</sup> Th |     | 1σ | <sup>207</sup> Pb/ <sup>206</sup> Pb |   | 1σ | <sup>207</sup> Pb/ <sup>235</sup> U |  | 1σ | <sup>206</sup> Pb/ <sup>238</sup> U |  | 1σ |
| <i>Qingduxiang granodiorite (N29°52'49.6", E88°19'51.5")</i> |                 |        |      |                                      |        |        |                                     |        |        |                                     |        |         |                                      |     |    |                                      |   |    |                                     |  |    |                                     |  |    |
| QDX-0-1                                                      | 903             | 866    | 1.0  | 0.0508                               | 0.0086 | 0.0568 | 0.0082                              | 0.0081 | 0.0004 | 0.0025                              | 0.0002 | 232     | 352                                  | 56  | 8  | 52                                   | 2 |    |                                     |  |    |                                     |  |    |
| QDX-0-2                                                      | 758             | 1148   | 0.7  | 0.0494                               | 0.0056 | 0.0532 | 0.0049                              | 0.0080 | 0.0002 | 0.0025                              | 0.0001 | 165     | 248                                  | 53  | 5  | 52                                   | 1 |    |                                     |  |    |                                     |  |    |
| QDX-0-3                                                      | 699             | 1057   | 0.7  | 0.0490                               | 0.0069 | 0.0585 | 0.0069                              | 0.0087 | 0.0002 | 0.0034                              | 0.0002 | 146     | 309                                  | 58  | 7  | 56                                   | 2 |    |                                     |  |    |                                     |  |    |
| QDX-0-4                                                      | 813             | 891    | 0.9  | 0.0582                               | 0.0158 | 0.0559 | 0.0110                              | 0.0085 | 0.0004 | 0.0028                              | 0.0002 | 600     | 443                                  | 55  | 11 | 55                                   | 3 |    |                                     |  |    |                                     |  |    |
| QDX-0-5                                                      | 725             | 1049   | 0.7  | 0.0486                               | 0.0049 | 0.0559 | 0.0056                              | 0.0086 | 0.0002 | 0.0025                              | 0.0001 | 128     | 222                                  | 55  | 5  | 55                                   | 1 |    |                                     |  |    |                                     |  |    |
| QDX-0-6                                                      | 834             | 1143   | 0.7  | 0.0517                               | 0.0068 | 0.0568 | 0.0058                              | 0.0086 | 0.0002 | 0.0026                              | 0.0001 | 272     | 274                                  | 56  | 6  | 55                                   | 2 |    |                                     |  |    |                                     |  |    |
| QDX-0-7                                                      | 1987            | 1851   | 1.1  | 0.0442                               | 0.0042 | 0.0515 | 0.0038                              | 0.0083 | 0.0002 | 0.0026                              | 0.0001 | -       | -                                    | 51  | 4  | 53                                   | 1 |    |                                     |  |    |                                     |  |    |
| QDX-0-8                                                      | 1071            | 1125   | 1.0  | 0.0470                               | 0.0058 | 0.0511 | 0.0055                              | 0.0082 | 0.0002 | 0.0024                              | 0.0001 | 56      | 265                                  | 51  | 5  | 52                                   | 2 |    |                                     |  |    |                                     |  |    |
| QDX-0-9                                                      | 611             | 990    | 0.6  | 0.0492                               | 0.0076 | 0.0539 | 0.0078                              | 0.0085 | 0.0003 | 0.0026                              | 0.0002 | 167     | 320                                  | 53  | 7  | 55                                   | 2 |    |                                     |  |    |                                     |  |    |
| QDX-0-10                                                     | 698             | 1052   | 0.7  | 0.0522                               | 0.0090 | 0.0588 | 0.0080                              | 0.0087 | 0.0004 | 0.0030                              | 0.0002 | 295     | 361                                  | 58  | 8  | 56                                   | 3 |    |                                     |  |    |                                     |  |    |
| QDX-0-11                                                     | 851             | 1228   | 0.7  | 0.0481                               | 0.0056 | 0.0564 | 0.0053                              | 0.0086 | 0.0003 | 0.0031                              | 0.0002 | 106     | 261                                  | 56  | 5  | 55                                   | 2 |    |                                     |  |    |                                     |  |    |
| QDX-0-12                                                     | 1665            | 1558   | 1.1  | 0.0477                               | 0.0045 | 0.0545 | 0.0044                              | 0.0084 | 0.0002 | 0.0028                              | 0.0001 | 87      | 207                                  | 54  | 4  | 54                                   | 1 |    |                                     |  |    |                                     |  |    |
| QDX-0-13                                                     | 720             | 1034   | 0.7  | 0.0450                               | 0.0074 | 0.0527 | 0.0064                              | 0.0084 | 0.0003 | 0.0027                              | 0.0002 | -       | -                                    | 52  | 6  | 54                                   | 2 |    |                                     |  |    |                                     |  |    |
| QDX-0-14                                                     | 532             | 853    | 0.6  | 0.0505                               | 0.0060 | 0.0603 | 0.0054                              | 0.0092 | 0.0002 | 0.0030                              | 0.0002 | 217     | 256                                  | 59  | 5  | 59                                   | 2 |    |                                     |  |    |                                     |  |    |
| QDX-0-15                                                     | 753             | 1116   | 0.7  | 0.0485                               | 0.0052 | 0.0536 | 0.0047                              | 0.0084 | 0.0002 | 0.0034                              | 0.0002 | 124     | 243                                  | 53  | 4  | 54                                   | 1 |    |                                     |  |    |                                     |  |    |
| QDX-0-16                                                     | 702             | 1059   | 0.7  | 0.0479                               | 0.0072 | 0.0542 | 0.0072                              | 0.0086 | 0.0002 | 0.0032                              | 0.0002 | 100     | 313                                  | 54  | 7  | 55                                   | 2 |    |                                     |  |    |                                     |  |    |
| QDX-0-17                                                     | 676             | 1033   | 0.7  | 0.0521                               | 0.0082 | 0.0595 | 0.0083                              | 0.0089 | 0.0003 | 0.0030                              | 0.0002 | 300     | 317                                  | 59  | 8  | 57                                   | 2 |    |                                     |  |    |                                     |  |    |
| QDX-0-18                                                     | 1895            | 1822   | 1.0  | 0.0522                               | 0.0063 | 0.0556 | 0.0064                              | 0.0078 | 0.0002 | 0.0030                              | 0.0002 | 295     | 256                                  | 55  | 6  | 50                                   | 2 |    |                                     |  |    |                                     |  |    |
| QDX-0-19                                                     | 660             | 1014   | 0.7  | 0.0512                               | 0.0078 | 0.0544 | 0.0080                              | 0.0087 | 0.0003 | 0.0030                              | 0.0002 | 250     | 318                                  | 54  | 8  | 56                                   | 2 |    |                                     |  |    |                                     |  |    |
| QDX-0-20                                                     | 644             | 653    | 1.0  | 0.0464                               | 0.0105 | 0.0566 | 0.0159                              | 0.0086 | 0.0004 | 0.0030                              | 0.0003 | 20      | 467                                  | 56  | 15 | 55                                   | 2 |    |                                     |  |    |                                     |  |    |
| QDX-0-21                                                     | 550             | 705    | 0.8  | 0.0524                               | 0.0114 | 0.0527 | 0.0091                              | 0.0084 | 0.0006 | 0.0024                              | 0.0003 | 302     | 443                                  | 52  | 9  | 54                                   | 4 |    |                                     |  |    |                                     |  |    |
| QDX-0-22                                                     | 695             | 1056   | 0.7  | 0.0518                               | 0.0064 | 0.0594 | 0.0058                              | 0.0090 | 0.0003 | 0.0033                              | 0.0002 | 280     | 259                                  | 59  | 6  | 58                                   | 2 |    |                                     |  |    |                                     |  |    |
| QDX-0-23                                                     | 922             | 1210   | 0.8  | 0.0453                               | 0.0056 | 0.0535 | 0.0059                              | 0.0084 | 0.0002 | 0.0027                              | 0.0002 | -       | -                                    | 53  | 6  | 54                                   | 1 |    |                                     |  |    |                                     |  |    |
| QDX-0-24                                                     | 309             | 526    | 0.6  | 0.0527                               | 0.0047 | 0.2630 | 0.0218                              | 0.0362 | 0.0007 | 0.0128                              | 0.0007 | 322     | 204                                  | 237 | 18 | 229                                  | 4 |    |                                     |  |    |                                     |  |    |
| QDX-0-25                                                     | 890             | 1252   | 0.7  | 0.0486                               | 0.0029 | 0.2516 | 0.0143                              | 0.0374 | 0.0006 | 0.0129                              | 0.0005 | 128     | 133                                  | 228 | 12 | 237                                  | 4 |    |                                     |  |    |                                     |  |    |
| <i>Longge'er gabbro (N31°07'30.8", E83°51'30.5")</i>         |                 |        |      |                                      |        |        |                                     |        |        |                                     |        |         |                                      |     |    |                                      |   |    |                                     |  |    |                                     |  |    |
| LGR-0-1                                                      | 223             | 345    | 0.7  | 0.0472                               | 0.0063 | 0.0524 | 0.0068                              | 0.0082 | 0.0002 | 0.0027                              | 0.0002 | 61      | 289                                  | 52  | 7  | 53                                   | 1 |    |                                     |  |    |                                     |  |    |

|          |     |     |     |        |        |        |        |        |        |        |        |     |     |     |    |     |   |
|----------|-----|-----|-----|--------|--------|--------|--------|--------|--------|--------|--------|-----|-----|-----|----|-----|---|
| LGR-0-2  | 725 | 899 | 0.8 | 0.0459 | 0.0042 | 0.1149 | 0.0106 | 0.0177 | 0.0004 | 0.0055 | 0.0002 | -   | -   | 110 | 10 | 113 | 3 |
| LGR-0-3  | 159 | 209 | 0.8 | 0.0532 | 0.0110 | 0.1250 | 0.0272 | 0.0170 | 0.0006 | 0.0053 | 0.0005 | 339 | 411 | 120 | 25 | 108 | 4 |
| LGR-0-4  | 360 | 373 | 1.0 | 0.0473 | 0.0111 | 0.0573 | 0.0201 | 0.0082 | 0.0004 | 0.0027 | 0.0002 | 65  | 481 | 57  | 19 | 53  | 2 |
| LGR-0-5  | 205 | 358 | 0.6 | 0.0506 | 0.0041 | 0.1166 | 0.0082 | 0.0175 | 0.0003 | 0.0053 | 0.0003 | 339 | 241 | 116 | 10 | 110 | 3 |
| LGR-0-6  | 219 | 214 | 1.0 | 0.0532 | 0.0056 | 0.1208 | 0.0113 | 0.0173 | 0.0004 | 0.0058 | 0.0002 | 350 | 304 | 122 | 14 | 115 | 3 |
| LGR-0-7  | 476 | 373 | 1.3 | 0.0535 | 0.0071 | 0.1281 | 0.0154 | 0.0179 | 0.0005 | 0.0056 | 0.0003 | 233 | 182 | 112 | 7  | 112 | 2 |
| LGR-0-8  | 155 | 270 | 0.6 | 0.0520 | 0.0096 | 0.0565 | 0.0081 | 0.0080 | 0.0003 | 0.0028 | 0.0003 | 287 | 374 | 56  | 8  | 51  | 2 |
| LGR-3-9  | 163 | 204 | 0.8 | 0.0453 | 0.0047 | 0.1103 | 0.0106 | 0.0184 | 0.0004 | 0.0046 | 0.0002 | -   | -   | 106 | 10 | 117 | 3 |
| LGR-0-10 | 247 | 262 | 0.9 | 0.0541 | 0.0074 | 0.1272 | 0.0154 | 0.0175 | 0.0006 | 0.0038 | 0.0003 | 376 | 311 | 122 | 14 | 112 | 4 |
| LGR-0-11 | 296 | 487 | 0.6 | 0.0454 | 0.0062 | 0.0514 | 0.0063 | 0.0087 | 0.0003 | 0.0020 | 0.0001 | -   | -   | 51  | 6  | 56  | 2 |
| LGR-0-12 | 417 | 286 | 1.5 | 0.0456 | 0.0051 | 0.1121 | 0.0118 | 0.0178 | 0.0004 | 0.0040 | 0.0002 | -   | -   | 108 | 11 | 114 | 3 |
| LGR-0-13 | 763 | 447 | 1.7 | 0.0551 | 0.0089 | 0.1272 | 0.0177 | 0.0172 | 0.0006 | 0.0041 | 0.0002 | 413 | 365 | 122 | 16 | 110 | 4 |
| LGR-0-14 | 169 | 289 | 0.6 | 0.0535 | 0.0062 | 0.0600 | 0.0057 | 0.0085 | 0.0003 | 0.0026 | 0.0002 | 350 | 258 | 59  | 5  | 55  | 2 |

Notes: The errors are  $1\sigma$ , which represent the standard deviation; "-" = under detection; common Pb was corrected by using the measured  $^{204}\text{Pb}$ . Common Pb was corrected by assuming  $^{206}\text{Pb}/^{238}\text{U}$ – $^{207}\text{Pb}/^{235}\text{U}$  age-concordance.
