# Supplementary material
Source: publisher figshare collection journal article supplement (https://tandf.figshare.com/articles/dataset/_/6509762)
Supplement: Supplementary file 5 [file 1]

**Supplementary Table 1** Mineral compositions for the representative plutons (“-” = under detection).

| Electron microprobe analyses of selected biotites (wt.%) |                  |                                |                  |                  |      |       |      |                   |                  |       |
|----------------------------------------------------------|------------------|--------------------------------|------------------|------------------|------|-------|------|-------------------|------------------|-------|
| Spot                                                     | SiO <sub>2</sub> | Al <sub>2</sub> O <sub>3</sub> | TiO <sub>2</sub> | <sup>T</sup> FeO | MnO  | MgO   | CaO  | Na <sub>2</sub> O | K <sub>2</sub> O | Total |
| <i>Longge'er gabbro</i>                                  |                  |                                |                  |                  |      |       |      |                   |                  |       |
| LGR-02-01                                                | 25.99            | 18.00                          | 0.03             | 21.55            | 0.10 | 17.90 | 0.01 | 0.08              | 0.04             | 83.70 |
| LGR-02-02                                                | 33.18            | 13.67                          | 3.16             | 17.97            | 0.04 | 12.84 | 0.01 | 0.26              | 9.96             | 91.08 |
| LGR-02-03                                                | 34.17            | 12.72                          | 3.01             | 18.14            | 0.04 | 12.26 | 0.10 | 0.23              | 9.70             | 90.36 |
| LGR-02-04                                                | 36.87            | 13.21                          | 3.72             | 18.23            | 0.02 | 12.74 | 0.01 | 0.08              | 10.14            | 95.01 |
| LGR-02-05                                                | 34.70            | 12.68                          | 3.73             | 17.76            | 0.05 | 12.00 | 0.00 | 0.17              | 9.91             | 91.01 |
| LGR-02-06                                                | 36.77            | 13.52                          | 3.09             | 17.52            | 0.14 | 13.78 | 0.00 | 0.15              | 10.28            | 95.25 |
| LGR-02-07                                                | 36.57            | 13.34                          | 3.15             | 17.59            | 0.08 | 13.12 | 0.02 | 0.26              | 9.97             | 94.09 |
| <i>Qingduxiang granodiorite</i>                          |                  |                                |                  |                  |      |       |      |                   |                  |       |
| QDX-02-01                                                | 35.80            | 11.75                          | 4.49             | 24.38            | 0.14 | 8.73  | 0.00 | 0.06              | 10.78            | 96.12 |
| QDX-02-02                                                | 35.95            | 11.79                          | 4.36             | 23.94            | 0.06 | 8.71  | 0.00 | 0.13              | 10.36            | 95.29 |
| QDX-02-03                                                | 35.75            | 11.94                          | 4.27             | 24.40            | 0.13 | 8.89  | 0.01 | 0.10              | 10.20            | 95.68 |
| QDX-02-04                                                | 35.95            | 11.38                          | 4.23             | 23.63            | 0.11 | 8.95  | 0.04 | 0.12              | 10.42            | 94.82 |
| QDX-02-05                                                | 36.34            | 11.63                          | 3.65             | 23.02            | 0.09 | 9.13  | 0.00 | 0.09              | 10.35            | 94.31 |
| QDX-02-06                                                | 35.40            | 12.11                          | 2.83             | 24.24            | 0.09 | 9.43  | 0.01 | 0.14              | 9.77             | 94.02 |
| QDX-02-07                                                | 35.66            | 11.67                          | 3.70             | 23.40            | 0.05 | 8.92  | 0.03 | 0.16              | 10.24            | 93.81 |
| QDX-02-08                                                | 35.73            | 11.60                          | 4.46             | 24.35            | 0.11 | 8.24  | 0.01 | 0.19              | 10.29            | 94.98 |
| QDX-02-09                                                | 35.96            | 11.99                          | 3.52             | 23.87            | 0.16 | 9.11  | 0.01 | 0.07              | 10.66            | 95.35 |

## Electron microprobe analyses of selected hornblendes (wt.%)

| Spot                            | Na <sub>2</sub> O | <sup>T</sup> FeO | P <sub>2</sub> O <sub>5</sub> | SiO <sub>2</sub> | Cr <sub>2</sub> O <sub>3</sub> | K <sub>2</sub> O | MgO   | MnO  | CaO   | Al <sub>2</sub> O <sub>3</sub> | NiO  | TiO <sub>2</sub> | Total |
|---------------------------------|-------------------|------------------|-------------------------------|------------------|--------------------------------|------------------|-------|------|-------|--------------------------------|------|------------------|-------|
| <i>Longge'er gabbro</i>         |                   |                  |                               |                  |                                |                  |       |      |       |                                |      |                  |       |
| LGR-01-01                       | 1.67              | 15.74            | 0.06                          | 42.36            | 0.01                           | 1.26             | 11.73 | 0.10 | 11.49 | 8.54                           | -    | 2.37             | 95.31 |
| LGR-01-02                       | 1.62              | 14.28            | 0.01                          | 43.50            | 0.03                           | 1.13             | 12.63 | 0.04 | 11.68 | 7.86                           | 0.03 | 2.27             | 95.07 |
| LGR-01-03                       | 1.31              | 14.70            | -                             | 44.92            | 0.07                           | 1.03             | 12.88 | 0.15 | 11.67 | 6.98                           | -    | 1.88             | 95.57 |
| LGR-01-04                       | 1.49              | 15.08            | -                             | 44.17            | 0.02                           | 0.95             | 11.70 | 0.11 | 11.37 | 7.19                           | 0.04 | 1.80             | 93.92 |
| LGR-01-05                       | 1.19              | 14.50            | 0.01                          | 46.97            | 0.05                           | 0.80             | 13.65 | 0.09 | 11.81 | 6.15                           | 0.07 | 1.17             | 96.45 |
| LGR-01-06                       | 1.13              | 14.83            | 0.02                          | 45.31            | 0.04                           | 0.94             | 12.92 | 0.06 | 11.66 | 6.80                           | -    | 1.29             | 94.99 |
| LGR-01-07                       | 0.92              | 13.90            | 0.07                          | 47.10            | -                              | 0.68             | 14.24 | 0.10 | 11.76 | 5.80                           | -    | 0.94             | 95.50 |
| LGR-01-08                       | 0.73              | 13.24            | 0.04                          | 48.25            | 0.05                           | 0.53             | 14.80 | 0.08 | 12.06 | 5.05                           | -    | 0.41             | 95.25 |
| LGR-01-09                       | 1.16              | 14.15            | 0.02                          | 46.40            | 0.10                           | 0.66             | 13.72 | 0.07 | 11.48 | 5.85                           | 0.01 | 1.16             | 94.78 |
| LGR-01-10                       | 1.03              | 13.62            | -                             | 47.62            | 0.05                           | 0.60             | 14.32 | 0.16 | 11.68 | 5.41                           | -    | 0.89             | 95.37 |
| <i>Qingduxiang granodiorite</i> |                   |                  |                               |                  |                                |                  |       |      |       |                                |      |                  |       |
| QDX-01-01                       | 0.89              | 17.53            | -                             | 49.14            | -                              | 0.36             | 11.75 | 0.20 | 11.65 | 3.52                           | 0.08 | 0.45             | 95.58 |
| QDX-01-02                       | 1.47              | 17.47            | -                             | 46.37            | 0.07                           | 0.79             | 11.60 | 0.24 | 10.67 | 5.40                           | 0.04 | 1.15             | 95.28 |
| QDX-01-03                       | 1.60              | 17.32            | -                             | 46.09            | -                              | 0.72             | 11.84 | 0.29 | 10.60 | 5.47                           | 0.05 | 1.09             | 95.06 |
| QDX-01-04                       | 1.51              | 17.18            | -                             | 47.05            | 0.09                           | 0.68             | 12.02 | 0.33 | 10.70 | 4.74                           | -    | 1.05             | 95.35 |
| QDX-01-05                       | 1.41              | 17.19            | -                             | 48.08            | 0.02                           | 0.46             | 12.51 | 0.30 | 10.15 | 4.35                           | -    | 0.72             | 95.19 |
| QDX-01-06                       | 0.99              | 17.85            | 0.02                          | 48.54            | -                              | 0.37             | 11.75 | 0.15 | 11.47 | 3.95                           | 0.03 | 0.65             | 95.77 |

## Electron microprobe analyses of selected feldspars (wt.%)

| Spot                            | Mineral     | Na <sub>2</sub> O | <sup>T</sup> FeO | P <sub>2</sub> O <sub>5</sub> | SiO <sub>2</sub> | Cr <sub>2</sub> O <sub>3</sub> | K <sub>2</sub> O | MgO  | MnO  | CaO   | Al <sub>2</sub> O <sub>3</sub> | NiO  | TiO <sub>2</sub> | Total |
|---------------------------------|-------------|-------------------|------------------|-------------------------------|------------------|--------------------------------|------------------|------|------|-------|--------------------------------|------|------------------|-------|
| <i>Longge'er gabbro</i>         |             |                   |                  |                               |                  |                                |                  |      |      |       |                                |      |                  |       |
| LGR-04-1                        | Plagioclase | 6.31              | 0.25             | 0.02                          | 54.98            | 0.01                           | 0.25             | -    | -    | 10.16 | 25.29                          | -    | 0.00             | 97.28 |
| LGR-04-2                        | Plagioclase | 6.72              | 0.25             | 0.05                          | 54.08            | 0.04                           | 0.21             | 0.00 | 0.01 | 10.13 | 24.65                          | -    | 0.01             | 96.14 |
| LGR-04-3                        | Plagioclase | 6.29              | 0.17             | -                             | 54.38            | 0.01                           | 0.25             | 0.02 | 0.03 | 10.32 | 25.64                          | 0.04 | 0.01             | 97.16 |
| LGR-04-4                        | Plagioclase | 7.62              | 0.21             | 0.01                          | 57.70            | 0.06                           | 0.07             | 0.00 | 0.02 | 8.57  | 24.53                          | 0.01 | 0.00             | 98.80 |
| <i>Qingduxiang granodiorite</i> |             |                   |                  |                               |                  |                                |                  |      |      |       |                                |      |                  |       |
| QDX-04-01                       | Plagioclase | 7.35              | 0.37             | -                             | 56.48            | -                              | 0.12             | 0.25 | -    | 8.66  | 24.04                          | 0.05 | -                | 97.32 |
| QDX-04-02                       | Plagioclase | 7.04              | 0.15             | 0.01                          | 56.99            | 0.02                           | 0.15             | -    | -    | 9.29  | 25.64                          | 0.02 | -                | 99.31 |
| QDX-04-03                       | Plagioclase | 8.49              | 0.13             | -                             | 60.22            | 0.00                           | 0.26             | -    | 0.00 | 6.41  | 23.20                          | 0.04 | 0.01             | 98.75 |
| QDX-04-04                       | Plagioclase | 8.76              | 0.11             | 0.04                          | 60.57            | 0.07                           | 0.19             | 0.03 | 0.00 | 5.59  | 21.94                          | -    | -                | 97.29 |
| QDX-04-05                       | Plagioclase | 8.86              | 0.13             | -                             | 60.61            | 0.02                           | 0.18             | -    | 0.01 | 5.48  | 21.56                          | 0.01 | -                | 96.86 |
| QDX-04-06                       | K-feldspar  | 1.60              | 0.10             | 0.05                          | 64.23            | 0.01                           | 15.35            | -    | -    | 0.01  | 16.85                          | 0.03 | 0.03             | 98.26 |
| QDX-04-07                       | K-feldspar  | 0.80              | 0.07             | -                             | 64.09            | -                              | 14.00            | -    | -    | 0.01  | 17.00                          | 0.01 | 0.02             | 96.00 |
| QDX-04-08                       | K-feldspar  | 0.93              | 0.15             | -                             | 64.63            | 0.03                           | 13.02            | -    | 0.01 | 0.05  | 17.47                          | -    | 0.03             | 96.31 |
| QDX-04-09                       | K-feldspar  | 1.39              | 0.17             | 0.02                          | 63.89            | -                              | 15.73            | -    | -    | 0.04  | 16.81                          | 0.03 | -                | 98.07 |
| QDX-04-10                       | K-feldspar  | 1.50              | 0.19             | 0.02                          | 62.61            | -                              | 14.88            | -    | -    | 0.04  | 16.61                          | 0.03 | -                | 95.88 |
| QDX-04-11                       | K-feldspar  | 0.65              | -                | -                             | 64.03            | 0.05                           | 15.42            | -    | -    | 0.01  | 16.80                          | -    | 0.02             | 96.98 |
| QDX-04-12                       | K-feldspar  | 1.01              | -                | 0.04                          | 63.80            | -                              | 14.99            | -    | 0.03 | -     | 16.95                          | 0.07 | -                | 96.89 |

Electron microprobe analyses of selected pyroxenes (wt.%)

| Spot                    | Na <sub>2</sub> O | TFeO  | P <sub>2</sub> O <sub>5</sub> | SiO <sub>2</sub> | Cr <sub>2</sub> O <sub>3</sub> | K <sub>2</sub> O | MgO   | MnO  | CaO   | Al <sub>2</sub> O <sub>3</sub> | NiO  | TiO <sub>2</sub> | Total  |
|-------------------------|-------------------|-------|-------------------------------|------------------|--------------------------------|------------------|-------|------|-------|--------------------------------|------|------------------|--------|
| <i>Longge'er gabbro</i> |                   |       |                               |                  |                                |                  |       |      |       |                                |      |                  |        |
| LGR-03-01               | 0.73              | 13.39 | 0.04                          | 49.59            | 0.12                           | 0.35             | 14.33 | 0.08 | 18.32 | 2.79                           | 0.04 | 0.18             | 99.94  |
| LGR-03-02               | 0.44              | 14.89 | -                             | 50.86            | 0.13                           | 0.22             | 13.82 | 0.04 | 16.45 | 2.20                           | -    | 0.08             | 99.12  |
| LGR-03-03               | 0.64              | 12.74 | -                             | 50.14            | 0.04                           | 0.27             | 15.13 | 0.18 | 17.41 | 3.46                           | -    | 0.12             | 100.13 |
| LGR-03-04               | 0.57              | 11.58 | -                             | 51.80            | 0.27                           | 0.16             | 15.72 | 0.11 | 16.22 | 3.06                           | 0.02 | 0.14             | 99.66  |
| LGR-03-05               | 0.71              | 14.43 | 0.02                          | 51.03            | -                              | 0.26             | 14.35 | 0.13 | 17.42 | 1.40                           | 0.04 | 0.15             | 99.94  |
| LGR-03-06               | 0.43              | 13.03 | -                             | 51.87            | 0.03                           | 0.07             | 14.57 | 0.12 | 16.40 | 3.11                           | 0.04 | 0.10             | 99.76  |
| LGR-03-07               | 0.29              | 13.34 | -                             | 52.87            | 0.04                           | 0.08             | 15.12 | 0.07 | 18.66 | 1.68                           | 0.05 | 0.02             | 102.22 |
| LGR-03-08               | 0.44              | 15.07 | -                             | 51.07            | 0.06                           | 0.09             | 13.32 | 0.14 | 17.41 | 1.10                           | 0.01 | 0.02             | 98.74  |
| LGR-03-09               | 0.72              | 15.76 | -                             | 49.69            | 0.10                           | 0.24             | 13.29 | 0.10 | 18.18 | 1.82                           | -    | 0.14             | 100.02 |
| LGR-03-10               | 0.72              | 15.04 | 0.04                          | 50.53            | 0.04                           | 0.21             | 13.90 | 0.07 | 17.26 | 1.60                           | 0.05 | 0.24             | 99.70  |
