# Supplementary material
Source: publisher figshare collection journal article supplement (https://tandf.figshare.com/articles/dataset/_/6509762)
Supplement: Supplementary file 6 [file 1]

**Supplementary Table 6** Analytical results of zircon Hf isotopes for the representative plutons

| Spot                                   | Age(Ma) | $^{176}\text{Yb}/^{177}\text{Hf}$ | $^{176}\text{Lu}/^{177}\text{Hf}$ | $^{176}\text{Hf}/^{177}\text{Hf}$ | $\pm 2\sigma$ | $(^{176}\text{Hf}/^{177}\text{Hf})_i$ | $\varepsilon_{\text{Hf}}(0)$ | $\varepsilon_{\text{Hf}}(\text{T})$ | $T_{\text{DM}}(\text{Ma})$ | $T_{\text{DM2}}(\text{Ma})$ | $f_{\text{Lu/Hf}}$ |
|----------------------------------------|---------|-----------------------------------|-----------------------------------|-----------------------------------|---------------|---------------------------------------|------------------------------|-------------------------------------|----------------------------|-----------------------------|--------------------|
| <i>Qingduxiang granodiorite (55Ma)</i> |         |                                   |                                   |                                   |               |                                       |                              |                                     |                            |                             |                    |
| QDX-0-1                                | 55      | 0.088473                          | 0.00211                           | 0.282737                          | 0.000022      | 0.282735                              | -1.2                         | -0.1                                | 752                        | 1131                        | -0.94              |
| QDX-0-2                                | 55      | 0.037417                          | 0.000913                          | 0.282714                          | 0.000019      | 0.282714                              | -2                           | -0.9                                | 760                        | 1179                        | -0.97              |
| QDX-0-3                                | 55      | 0.052823                          | 0.001296                          | 0.282739                          | 0.000022      | 0.282737                              | -1.2                         | 0                                   | 733                        | 1125                        | -0.96              |
| QDX-0-4                                | 55      | 0.078941                          | 0.00201                           | 0.282755                          | 0.000024      | 0.282753                              | -0.6                         | 0.5                                 | 724                        | 1091                        | -0.94              |
| QDX-0-5                                | 55      | 0.046901                          | 0.001119                          | 0.282737                          | 0.00002       | 0.282736                              | -1.2                         | -0.1                                | 731                        | 1128                        | -0.97              |
| QDX-0-6                                | 55      | 0.03046                           | 0.00077                           | 0.282753                          | 0.000023      | 0.282752                              | -0.7                         | 0.5                                 | 703                        | 1092                        | -0.98              |
| QDX-0-7                                | 55      | 0.081845                          | 0.001886                          | 0.282699                          | 0.00002       | 0.282697                              | -2.6                         | -1.5                                | 803                        | 1217                        | -0.94              |
| QDX-0-8                                | 55      | 0.046363                          | 0.00113                           | 0.282742                          | 0.000022      | 0.282741                              | -1.1                         | 0.1                                 | 725                        | 1118                        | -0.97              |
| QDX-0-9                                | 55      | 0.038915                          | 0.000969                          | 0.282733                          | 0.000022      | 0.282732                              | -1.4                         | -0.2                                | 735                        | 1138                        | -0.97              |
| QDX-0-10                               | 55      | 0.057037                          | 0.001501                          | 0.282732                          | 0.000026      | 0.28273                               | -1.4                         | -0.3                                | 747                        | 1142                        | -0.95              |
| QDX-0-11                               | 55      | 0.052919                          | 0.00123                           | 0.282746                          | 0.000021      | 0.282744                              | -0.9                         | 0.2                                 | 722                        | 1110                        | -0.96              |
| QDX-0-12                               | 55      | 0.049029                          | 0.001244                          | 0.282706                          | 0.000023      | 0.282705                              | -2.3                         | -1.2                                | 778                        | 1199                        | -0.96              |
| QDX-0-13                               | 55      | 0.043934                          | 0.001247                          | 0.282722                          | 0.000023      | 0.28272                               | -1.8                         | -0.6                                | 757                        | 1164                        | -0.96              |
| QDX-0-14                               | 55      | 0.04182                           | 0.001042                          | 0.282742                          | 0.00002       | 0.282741                              | -1.1                         | 0.1                                 | 724                        | 1118                        | -0.97              |
| QDX-0-15                               | 55      | 0.043829                          | 0.001037                          | 0.282698                          | 0.000022      | 0.282697                              | -2.6                         | -1.4                                | 785                        | 1216                        | -0.97              |
| QDX-0-16                               | 55      | 0.072822                          | 0.001738                          | 0.282737                          | 0.000024      | 0.282736                              | -1.2                         | -0.1                                | 744                        | 1129                        | -0.95              |
| <i>Longge'er gabbro (54Ma)</i>         |         |                                   |                                   |                                   |               |                                       |                              |                                     |                            |                             |                    |
| LGR-0-1                                | 54      | 0.103989                          | 0.003093                          | 0.282794                          | 0.003098      | 0.282791                              | 0.8                          | 1.9                                 | 687                        | 1005                        | -0.91              |
| LGR-0-2                                | 54      | 0.058777                          | 0.001476                          | 0.282707                          | 0.000272      | 0.282706                              | -2.3                         | -1.2                                | 782                        | 1197                        | -0.96              |
| LGR-0-3                                | 54      | 0.044109                          | 0.001153                          | 0.282774                          | 0.002121      | 0.282773                              | 0.1                          | 1.2                                 | 680                        | 1046                        | -0.97              |
| LGR-0-4                                | 54      | 0.077842                          | 0.00208                           | 0.282727                          | 0.001485      | 0.282725                              | -1.6                         | -0.5                                | 765                        | 1154                        | -0.94              |
| LGR-0-5                                | 54      | 0.047998                          | 0.001214                          | 0.282745                          | 0.000823      | 0.282744                              | -0.9                         | 0.2                                 | 722                        | 1111                        | -0.96              |
| LGR-0-6                                | 54      | 0.049694                          | 0.001262                          | 0.282733                          | 0.001592      | 0.282732                              | -1.4                         | -0.2                                | 740                        | 1138                        | -0.96              |
| LGR-0-7                                | 54      | 0.070743                          | 0.001891                          | 0.282716                          | 0.002974      | 0.282715                              | -2                           | -0.8                                | 777                        | 1177                        | -0.94              |
| LGR-0-8                                | 54      | 0.078619                          | 0.001973                          | 0.282793                          | 0.001592      | 0.282791                              | 0.7                          | 1.9                                 | 668                        | 1006                        | -0.94              |
| LGR-0-9                                | 54      | 0.073263                          | 0.00196                           | 0.28278                           | 0.001497      | 0.282778                              | 0.3                          | 1.4                                 | 686                        | 1035                        | -0.94              |
| LGR-0-10                               | 54      | 0.074648                          | 0.001905                          | 0.282791                          | 0.001846      | 0.282789                              | 0.7                          | 1.8                                 | 670                        | 1010                        | -0.94              |

|          |    |          |          |          |          |          |    |      |     |      |       |
|----------|----|----------|----------|----------|----------|----------|----|------|-----|------|-------|
| LGR-0-11 | 54 | 0.065657 | 0.001711 | 0.282717 | 0.002465 | 0.282715 | -2 | -0.8 | 773 | 1177 | -0.95 |
|----------|----|----------|----------|----------|----------|----------|----|------|-----|------|-------|

Notes:  $\varepsilon_{\text{Hf}}(0) = ((^{176}\text{Hf}/^{177}\text{Hf})_{\text{S}} / (^{176}\text{Hf}/^{177}\text{Hf})_{\text{CHUR}} - 1) \times 10,000$ ,  $\varepsilon_{\text{Hf}}(t) = ((^{176}\text{Hf}/^{177}\text{Hf})_{\text{S}} - (^{176}\text{Lu}/^{177}\text{Hf})_{\text{S}} \times (e^{\lambda t} - 1)) / ((^{176}\text{Hf}/^{177}\text{Hf})_{\text{CHUR},0} - (^{176}\text{Lu}/^{177}\text{Hf})_{\text{CHUR}} \times (e^{\lambda t} - 1)) - 1) \times 10,000$ ,  $T_{\text{DMI}}(\text{Hf}) = 1/\lambda \times \log[1 + ((^{176}\text{Hf}/^{177}\text{Hf})_{\text{S}} - (^{176}\text{Hf}/^{177}\text{Hf})_{\text{DM}}) / ((^{176}\text{Lu}/^{177}\text{Hf})_{\text{S}} - (^{176}\text{Lu}/^{177}\text{Hf})_{\text{DM}})]$ ,  $T_{\text{DM2}}(\text{Hf}) = T_{\text{DMI}}(\text{Hf}) - (T_{\text{DMI}}(\text{Hf}) - t)(f_{\text{CC}} - f_{\text{S}}) / (f_{\text{CC}} - f_{\text{DM}})$ ,  $f_{\text{Lu/Hf}} = (^{176}\text{Lu}/^{177}\text{Hf})_{\text{S}} / (^{176}\text{Lu}/^{177}\text{Hf})_{\text{CHUR}} - 1$ ,  $(^{176}\text{Lu}/^{177}\text{Hf})_{\text{CHUR}} = 0.0332$ ,  $(^{176}\text{Hf}/^{177}\text{Hf})_{\text{CHUR},0} = 0.282772$  (Blichert-Toft and Albarède 1997),  $(^{176}\text{Lu}/^{177}\text{Hf})_{\text{DM}} = 0.0384$ ,  $(^{176}\text{Hf}/^{177}\text{Hf})_{\text{DM}} = 0.28325$  (Griffin *et al.* 2000),  $f_{\text{CC}} = [(^{176}\text{Lu}/^{177}\text{Hf})_{\text{mean crust}} / (^{176}\text{Lu}/^{177}\text{Hf})_{\text{CHUR}}] - 1$ ,  $f_{\text{DM}} = [(^{176}\text{Lu}/^{177}\text{Hf})_{\text{DM}} / (^{176}\text{Lu}/^{177}\text{Hf})_{\text{CHUR}}] - 1$ ,  $\lambda = 1.867 \times 10^{-11} \text{ year}^{-1}$  (Söderlund *et al.* 2004),  $t$  = crystallization age of zircon.  $(^{176}\text{Hf}/^{177}\text{Hf})_{\text{S}}$  and  $(^{176}\text{Lu}/^{177}\text{Hf})_{\text{S}}$  are the measured values of samples;  $f_{\text{CC}}$ ,  $f_{\text{S}}$ , and  $f_{\text{DM}}$  are the  $f_{\text{Lu/Hf}}$  of crust, sample, and depleted mantle, respectively. The  $2\sigma$  represents two standard deviation.

Blichert-Toft, J., and Albarede, F., 1997, The Lu-Hf isotope geochemistry of chondrites and the evolution of the mantle-crust system: Earth and Planetary Science Letters v.148, p. 243-258. [https://doi.org/10.1016/S0012-821X\(97\)00040-X](https://doi.org/10.1016/S0012-821X(97)00040-X)

Griffin, W.L., Pearson, N.J., Belousova, E., Jackson, S.E., van Achterbergh, E., O'Reilly, S.Y., and Shee, S.R., 2000, The Hf isotope composition of cratonic mantle: LAM-MC-ICPMS analysis of zircon megacrysts in kimberlites-Kimberlites and related rocks: Geochimica et Cosmochimica Acta, v. 64, p. 133-147. [https://doi.org/10.1016/S0016-7037\(99\)00343-9](https://doi.org/10.1016/S0016-7037(99)00343-9)

Söderlund, U., Jonathan, P.P., Vervoort, J.D., and Isachsen, C.E., 2004, The  $^{176}\text{Lu}$  decay constant determined by Lu-Hf and U-Pb isotope systematics of Precambrian mafic intrusions: Earth and Planetary Science Letters, v. 219, p. 311-324. [https://doi.org/10.1016/S0012-821X\(04\)00012-3](https://doi.org/10.1016/S0012-821X(04)00012-3)
